# Supplementary material
Source: publisher figshare collection journal article supplement (https://karger.figshare.com/ndownloader/files/37560835)
Supplement: Supplementary file 1 [file 37560835]

Supplementary Table 1.Patient demographics and baseline characteristics of patients who underwent MicroShunt implantation (ITT population).

| Variable | Overall population  (*N* = 67) |
| --- | --- |
| Mean age ± SD, years | 64.1 ± 13.2 |
| Male, *n* (%) | 39 (58.2) |
| Lens status, *n* (%) |  |
| Phakic | 34 (50.7) |
| Pseudophakic | 33 (49.3) |
| Mean IOP ± SD, mmHg | 26.0 ± 6.7 |
| IOP ≥18 and ≤21 mmHg, *n* (%) | 20 (29.9) |
| IOP >21 and ≤40 mmHg, *n* (%) | 46 (68.7) |
| Median IOP (IQR), mmHg | 25.0 (9.0) |
| Mean number of glaucoma medications ± SD | 2.9 ± 1.2 |
| Median number of glaucoma medications (IQR) | 3.0 (2.0) |
| Mean VA ± SD, logMAR | 0.31 ± 0.64 |
| Median VA (IQR), logMAR | 0.10 (0.30) |

IOP, intraocular pressure; IQR, interquartile range; ITT, intention-to-treat; SD, standard deviation; VA, visual acuity.
